# Supplementary material for: EMM-17 as an efficient catalyst for the one-step conversion of high-concentration lactic acid into lactide
Source: Royal Society of Chemistry journal article supplement (doi:10.1039/d6sc02768g), 2026-06-08
Supplement: d6sc02768g1.pdf [file d6sc02768g1.pdf]

# Supporting Information

1

2

3 **EMM-17 as an efficient catalyst for the one-step conversion of high-concentration**  
4 **lactic acid into lactide**

5

6 Binyao Feng, <sup>†a</sup> Kunhao Shen, <sup>†a</sup> Chenxu Liu, <sup>ab</sup> Xingrui Wang, <sup>c</sup> Cailing Chen, <sup>b</sup> Jian  
7 Zhang, <sup>d</sup> Huiyong Chen, <sup>c</sup> Feijian Chen, <sup>\*ab</sup> Yi Li, <sup>\*ab</sup> Jihong Yu <sup>\*ab</sup>

8

9 <sup>a</sup> State Key Laboratory of Inorganic Synthesis and Preparative Chemistry, College of  
10 Chemistry, Jilin University, Changchun 130012, P. R. China

11 <sup>b</sup> International Center of Future Science, Jilin University, Changchun 130012, P. R.  
12 China

13 <sup>c</sup> School of Chemical Engineering, Northwest University, Xi'an, Shaanxi 710069, P. R.  
14 China

15 <sup>d</sup> Beijing Advanced Innovation Center for Soft Matter, Science and Engineering,  
16 Beijing University of Chemical Technology, Beijing, P. R. China

17 <sup>†</sup> These authors contributed equally to this work.

18

|    |                                                       |
|----|-------------------------------------------------------|
| 19 | <b>Contents</b>                                       |
| 20 | <b>1. Experimental Sections and Characterizations</b> |
| 21 | <b>1.1 Chemicals and reagents</b>                     |
| 22 | <b>1.2 Synthesis</b>                                  |
| 23 | <b>1.3 Characterizations</b>                          |
| 24 | <b>1.4 Silylation treatments</b>                      |
| 25 | <b>1.5 Density Functional theory calculation</b>      |
| 26 | <b>2. Catalytic Tests</b>                             |
| 27 | <b>3. Supplementary Figures and Tables</b>            |
| 28 | <b>4. References</b>                                  |

## 29 **1 Experimental Sections and Characterizations**

### 30 **1.1 Chemicals and reagents**

31 All chemicals and reagents were supplied by commercial suppliers and used without  
32 further purification: Tetraethylorthosilicate (TEOS, Macklin Company), 4-  
33 (pyrrolidine-1-yl) pyridine (97%, Innochem chemical), Iodoethane (99.9%, Innochem  
34 chemical), Aluminum nitrate nonahydrate ( $\text{Al}(\text{NO}_3)_3$ , 99.0%, Innochem chemical),  
35 Hydrofluoric acid (HF, 40%, Aladdin chemical), Amberlite IRN-78 (ion exchange  
36 resin, nuclear grade Alfa Aesar Company), H-Beta zeolite (Si/Al = 12.5, Alfa Aesar  
37 Company), Tetrapropylammonium hydroxide solution (TBAOH, 25wt%, Sinopharm  
38 Chemical Reagent Co, Ltd.), Tetrapropylammonium hydroxide solution (TPAOH,  
39 25wt%, Sinopharm Chemical Reagent Co, Ltd.), Aluminium isopropoxide (99.99%,  
40 Innochem chemical), Ammonium fluoride (99.99%, Innochem chemical), Sodium  
41 aluminate ( $\text{NaAlO}_2$ , CP, Sinopharm Chemical Reagent Co, Ltd.), L-Lysine (98%,  
42 Innochem chemical), Sodium hydroxide (NaOH, AR, 98%, Tianjin Yongsheng  
43 Chemical Reagent Co, Ltd.), Ammonium nitrate (95%, Supelco), Lactic acid (LA, 105  
44 wt%, Zhejiang Hisun Biomaterials Company), Toluene (99.5%, Tianjin Xintong  
45 Chemical Reagent Co, Ltd.).

### 46 **1.2 Synthesis**

#### 47 **Synthesis of ODSA, 1-ethyl-4-(pyrrolidin-1-yl) pyridine-1-ium hydroxide**

48 Iodoethane (19.5g) was added to a solution of 4-(pyrrolidine-1-yl) pyridine (14.821g)  
49 dissolved in ethanol (80ml). The reaction was heat at 60 °C and stirred for 1 days. The  
50 ethanol solvent and excess iodoethane were removed by rotary evaporation, yielding a  
51 colorless oily liquid. Subsequently, tetrahydrofuran (THF) was slowly added to the  
52 reaction flask under stirring and heating at 80 °C. The formation of fine white  
53 particulate solids was observed. The solids were collected by filtration, washed with  
54 THF, and dried to afford the product as the iodide salt. The iodide salt was subsequently  
55 converted to a hydroxide solution by column ion-exchange using an excess of anion  
56 exchange resin.

### 57 **Synthesis of EMM-17 zeolite**

58 In a typical process, a specified mass of OSDA solution was charged into the reaction  
59 vessel. Under stirring, a specified volume of aluminum nitrate solution was added,  
60 followed by the addition of 0.45 mL tetraethyl orthosilicate (TEOS). After hydrolysis  
61 for 5 hours, 0.256 mL of 40% hydrofluoric acid (HF) solution was introduced. Stirring  
62 was continued for an additional 30 minutes. The stir bar was then removed, and the  
63 mixture was transferred to an 80 °C oven to evaporate excess water until the theoretical  
64 weight was attained. The gel composition was SiO<sub>2</sub>: 0.8 OSDAOH: 0.0167 Al<sub>2</sub>O<sub>3</sub>: 0.8  
65 HF: 5 H<sub>2</sub>O. The resulting solid was transferred into a 3 mL Teflon-lined stainless-steel  
66 autoclave and subjected to crystallization at 160 °C for 5 days. The as-prepared solid  
67 samples were centrifuged, washed with water and ethanol several times, and dried at  
68 80 °C in the oven overnight. And then calcined at 550 °C for 6 h to remove template.

### 69 **Synthesis of ZSM-5 zeolite.**

70 Initially, 7.33 g of a 40 wt.% aqueous solution of tetrapropylammonium hydroxide  
71 (TPAOH) was mixed with 5 ml of deionized water. Subsequently, 4.23 g of tetraethyl  
72 orthosilicate (TEOS) was added, and the mixture was stirred to allow for hydrolysis.  
73 Following hydrolysis, 0.058 g of sodium aluminate was introduced, and finally, 1.12 g  
74 of L-lysine was added. The resulting mixture was stirred thoroughly and then  
75 transferred into the Teflon liner of a stainless-steel autoclave. First-stage crystallization  
76 was performed at 90 °C for 2 days, followed by second-stage crystallization at 170 °C  
77 for 1 day. The as-prepared solid samples were centrifuged, washed with water and  
78 ethanol several times, and dried at 80 °C in the oven overnight. And then calcined at  
79 550 °C for 6 h to remove template.

### 80 **Synthesis of ZSM-5-M zeolite.**

81 1 g of the aforementioned synthesized ZSM-5 zeolite was treated with 20 g of a 40wt%  
82 aqueous ammonium fluoride (NH<sub>4</sub>F) solution at 50 °C for 5 minutes under stirring. The  
83 solid product was then recovered by centrifugation, rinsed repeatedly with deionized  
84 water until the supernatant reached a neutral pH, and dried. The resulting material,

85 denoted as ZSM-5-M, was obtained via the etching method. And then calcined at 550  
86 °C for 6 h to remove template.

### 87 **Synthesis of self-pillared pentasil (SPP) zeolite**

88 Initially, 12.4 g of a 40 wt.% aqueous tetrabutylammonium hydroxide (TBAOH)  
89 solution was thoroughly mixed with 3.0 g of deionized water. Subsequently, 122 mg of  
90 aluminum isopropoxide was added, and the mixture was stirred for 30 minutes.  
91 Following this, 12 mg of sodium hydroxide (NaOH) and 12.48 g of tetraethyl  
92 orthosilicate (TEOS) were introduced. Stirring was continued for 4 hours to ensure  
93 complete hydrolysis of TEOS. The resulting homogeneous solution was transferred into  
94 a 100 mL Teflon-lined stainless-steel autoclave. Hydrothermal crystallization was  
95 performed in an oven using a two-stage temperature profile: first at 80 °C for 1 day  
96 (low-temperature pre-crystallization), followed by further crystallization at 160 °C for  
97 2 days. The synthesized solid product was recovered by centrifugation and sequentially  
98 washed with deionized water and absolute ethanol until neutral. The purified material  
99 was dried at 80 °C for 12 hours. To remove organic templates, calcination was  
100 conducted at 550 °C for 6 hours under static air. The calcined zeolite was converted to  
101 its protonated form via ion exchange. This involved three cycles of treatment with an  
102 aqueous ammonium nitrate solution (1 M) under stirring at 80 °C for 4 hours, with  
103 intermediate centrifugation and washing steps. The final H-SPP product was dried  
104 overnight at 80 °C. And then calcined at 550 °C for 6 h to remove template.

### 105 **1.3 Characterizations**

106 Scanning electron microscopy images were measured with JEOL JSM-7800F. The  
107 transmission electron microscopy images were measured with Tencai F20 and Thermo  
108 Fisher Scientific (FEI) Talos F200s electron microscope. iDPC-STEM experiments  
109 were performed using a double Cs-corrected microscope (FEI Titan Cubed Themis Z),  
110 operated at 300 kV. The powder X-ray diffraction measurements were performed on a  
111 Rigaku Miniflex 300 diffractometer by using Cu K $\alpha$  radiation. Nitrogen  
112 adsorption/desorption isotherms were measured on BSD-660 high performance  
113 physical adsorption analyzer at 77 K. The materials (100 mg) were degassed under

114 vacuum at 350 °C for 12 h before nitrogen adsorption at -196 °C. The solid-state  
115 nuclear resonance (NMR) spectra of <sup>27</sup>Al and <sup>29</sup>Si were collected using the magic-angle  
116 spinning (MAS) technique on a JEOL ECZ500R NMR spectrometer, operating at the  
117 frequencies of 79.49 and 100.62 MHz, respectively. NH<sub>3</sub>-TPD was performed on  
118 Micromeritics/Autochem II 2920, from 100 to 550 °C (ramp rate 10 °C min<sup>-1</sup>) under He  
119 (60 cm<sup>3</sup> min<sup>-1</sup>), with desorbed NH<sub>3</sub> monitored by thermal conductivity.  
120 Thermogravimetric (TG) analysis was performed on a TA company TGA Q500 unit at  
121 a heating rate of 10 °C min<sup>-1</sup> from room temperature to 800 °C in air. The Py-FTIR test  
122 was carried out using Bruker EQUINOX55 infrared spectrometer. *In situ* FT-IR spectra  
123 of 2,4,6-tri-tert-butylpyridine (TTBP) adsorption were measured on a Bruker VERTEX  
124 70 infrared spectrometer equipped with an in situ cell. <sup>1 2</sup>

#### 125 **1.4 Silylation treatment**

126 For the TBCS-silylation treatment, the entire process was carried out in a fixed-bed  
127 reactor. First, EMM-17 was filled into a quartz reactor tube. One end of the tube was  
128 connected to an injection needle containing TBCS, and TBCS was transported to the  
129 quartz tube by pulsed injection using N<sub>2</sub> as the carrier gas. Another end of the quartz  
130 tube was connected to a diaphragm vacuum pump to remove the TBCS physically  
131 absorbed by EMM-17. The specific silylation process was carried out according to the  
132 following steps: First, 1.0 g of EMM-17 sample (40-60 mesh) was weighed, and the  
133 EMM-17 was pre-treated at 500 °C under N<sub>2</sub> gas for 2 hours. Then, the reaction furnace  
134 temperature was adjusted to the temperature required for silylation (usually 450 °C).  
135 Next, TBCS carried by N<sub>2</sub> (30 mL/min) was vaporized and reacted with EMM-17 for  
136 4 hours. Subsequently, the sample was purged with N<sub>2</sub> (30 mL/min) for 2 hours, and  
137 then maintained at the same temperature, and in situ degassing treatment was carried  
138 out using a static vacuum system for 12 hours to remove the physically adsorbed TBCS.  
139 Finally, the sample was calcined at 550 °C in an air atmosphere for 6 hours to remove  
140 the carbon-hydrocarbon organic groups.

#### 141 **1.5 Density Functional theory calculation**

142 In this work, the DFT calculations have been conducted using the Vienna Ab initio  
143 Simulation Package (VASP),<sup>3</sup> which operates on a plane wave basis. The projective  
144 augmented wave (PAW) method is employed to model the interaction between  
145 electrons and ions,<sup>4, 5</sup> while the generalized gradient approximation (GGA) with the  
146 Perdew-Burke-Ernzerhof (PBE) functional is applied to address exchange interactions  
147 and related effects.<sup>6</sup> A plane-wave cutoff energy of 450 eV is utilized, with k-point  
148 sampling restricted to the Gamma point. Convergence during the iterative process was  
149 reached when the force and energy differences are less than 0.05 eV/Å and 10<sup>-5</sup> eV,  
150 respectively. Transition states were identified using the CI-NEB and Dimer methods.<sup>7,</sup>  
151 <sup>8</sup> Additionally, vibrational frequency analysis was carried out to distinguish between  
152 minimum and transition states, as well as to calculate free energy.

153 In this work, the initial bulk zeolite structures of EMM-17A and EMM-17B were  
154 selected from International Zeolite Association structure database. Based on the TEM  
155 results, EMM-17 is identified as a layered material with the [010] crystal plane  
156 exhibiting the largest exposed area. According to the surface energy calculation  
157 formula, a lower number of surface hydroxyl groups corresponds to lower energy and  
158 greater structural stability. Therefore, the half-ring surface configuration cut from the  
159 [010] crystal plane is utilized for subsequent calculations. To minimize periodic  
160 boundary effects in the direction normal to the surface, a vacuum layer of 20 Å was  
161 added along the c-axis to create the EMM-17 [010] model. The lattice parameters  
162 measured of optimized EMM-17 was 12.5955×24.7418×34.9426 Å<sup>3</sup> and angles  
163  $a=\beta=\gamma=90^\circ$ .

## 164 **2 Catalytic tests**

165 Typically, 1.0 g of EMM-17 zeolite catalyst, 1.0 g 105 wt.% LA feedstock, and 20mL  
166 of toluene were added in a 25mL round bottom flask under magnetic stirring. On top  
167 of the setup, a phase-settler/solvent reflux trap was installed, filled beforehand with 25  
168 mL of toluene. This setup assured reflux of toluene while trapping water. The solvent  
169 floated on top and moved to the flask while the water sank to the bottom of the trap  
170 where it accumulated. The oil bath was held at 140 °C to assure reflux. Under

171 continuous stirring, 0.4 mL of the mixture was taken out at different time intervals  
172 during 5 h. Then the withdrawn mixture was added with excess acetonitrile, and placed  
173 for three hours. Three hour later, the mixture was filtered with Syringe Filter (PTFE,  
174 0.2  $\mu\text{m}$ ) to isolate the solid zeolites. The filtered solution was divided and dried under  
175 vacuum at room temperature for 24 h to remove toluene and acetonitrile solvents for  
176 HPLC and  $^1\text{H-NMR}$  analysis based on the work by Dusselier *et al.* <sup>9</sup>

177 High pressure liquid chromatography (HPLC) and proton nuclear magnetic  
178 resonance spectroscopy ( $^1\text{H-NMR}$ ) was adopted for determining product yields and LA  
179 conversion.

180 **HPLC:** The dried sample was dissolved in water: acetonitrile mixture (50: 50, V:  
181 V), then the solution with 2 mg/mL was qualitatively analyzes by HPLC. This method  
182 was based on the work by Dusselier *et al.* HPLC measurements were conducted with  
183 an Agilent 1200 series HPLC system (pump, UV/Visible (UV/Vis) Detector at 210nm).  
184 The flow rate was 1.0 mL/min on a  $\text{C}_{18}$  column oven temperature was maintained at 25  
185  $^{\circ}\text{C}$ . Two solvents were used in the elution program: a) water (with addition of 2mL of  
186 85%  $\text{H}_3\text{PO}_4$  per Liter); b) 100% acetonitrile (with addition of 2mL of 85%  $\text{H}_3\text{PO}_4$  per  
187 Liter). The elution program (a/b, V/V) was as follows: minute 0-1: 90/10; minute 1-3:  
188 linear ramp to 10/90; minute 3-10: 10/90; and minute 10-20: return to 90/10. From  
189 HPLC spectra, the proportion of LA,  $\text{L}_2\text{A}$ ,  $\text{L}_3\text{A}$ ,  $\text{L}_n\text{A}$  ( $n > 3$ ) and LT were estimated  
190 according to formula below:

191 
$$\text{LA proportion (\%)} = [(\text{LA area\% of the sample}) / (\text{all area\%})] * 100\%$$

192 
$$\text{L}_2\text{A proportion (\%)} = [(\text{L}_2\text{A area\% of the sample}) / (\text{all area\%})] * 100\%$$

193 
$$\text{L}_3\text{A proportion (\%)} = [(\text{L}_3\text{A area\% of the sample}) / (\text{all area\%})] * 100\%$$

194 
$$\text{L}_n\text{A proportion (\%)} = [(\text{L}_n\text{A area\% of the sample}) / (\text{all area\%})] * 100\%$$

195 
$$\text{LT proportion (\%)} = [(\text{LT area\% of the sample}) / (\text{all area\%})] * 100\%$$

196  **$^1\text{H-NMR}$ :** The chemical structures of the reaction mixtures were calculated based  
197 on  $^1\text{H-NMR}$  (Bruker Avance 300) and  $\text{d}_6$ -dimethyl sulfoxide ( $\text{d}_6$ -DMSO) was used as  
198 the solvent. As shown in Figures S13, signals from 5.5 ppm (A) were assigned to the

199 methine proton of the lactide, while the methine proton signals corresponding to the  
200 oligomers segment appeared at 5.2 ppm (C), 5.0 ppm (B), 4.2 ppm (D) were derived  
201 from carboxylic end groups of oligomers, centers of oligomers, and hydroxyl end  
202 groups of oligomers, respectively. The methine proton signals derived from the lactic  
203 acid were detected at 4.0 ppm (E). From <sup>1</sup>H-NMR spectra, the lactide yield was  
204 estimated according to formula: LT5 yield (mol%) = (A / A+B+C+D+E)×100.

205 The lactide yields from these two characterization techniques were in good  
206 agreement (< 5% difference).

207

208 **3 Supplementary Figures and Tables**

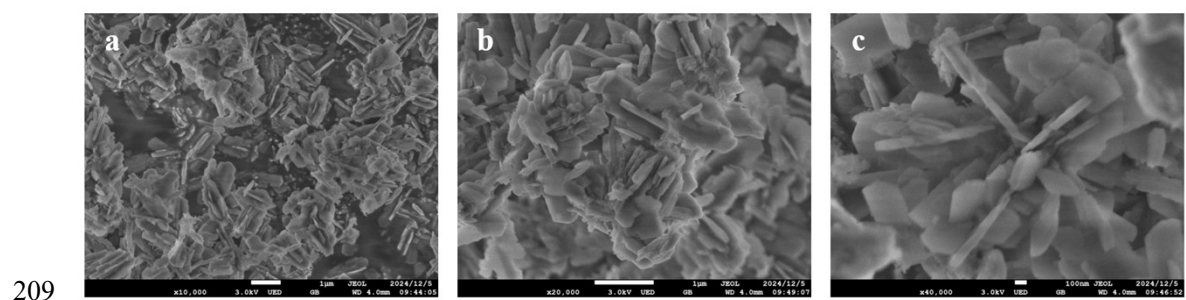

Fig.S1 SEM images of as-made EMM-17

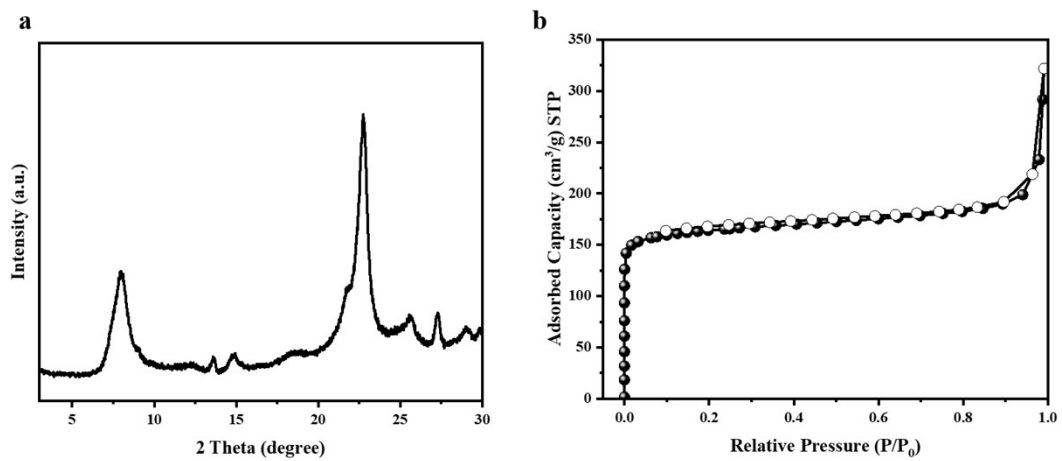

212

213 Fig.S2 (a) PXRD patterns and (b) N<sub>2</sub> adsorption-desorption isotherms of Beta-C

214

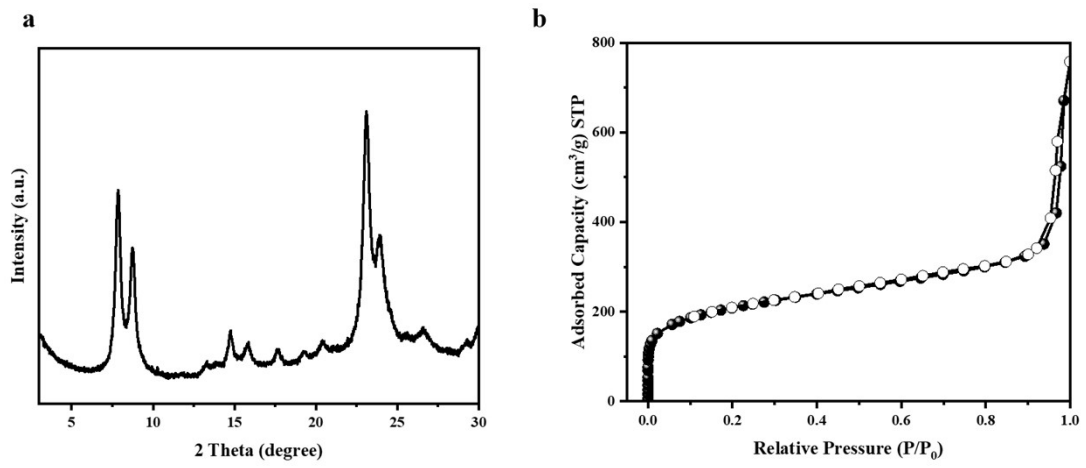

215

216 Fig.S3 (a) PXRD patterns and (b) N<sub>2</sub> adsorption-desorption isotherms of SPP

217

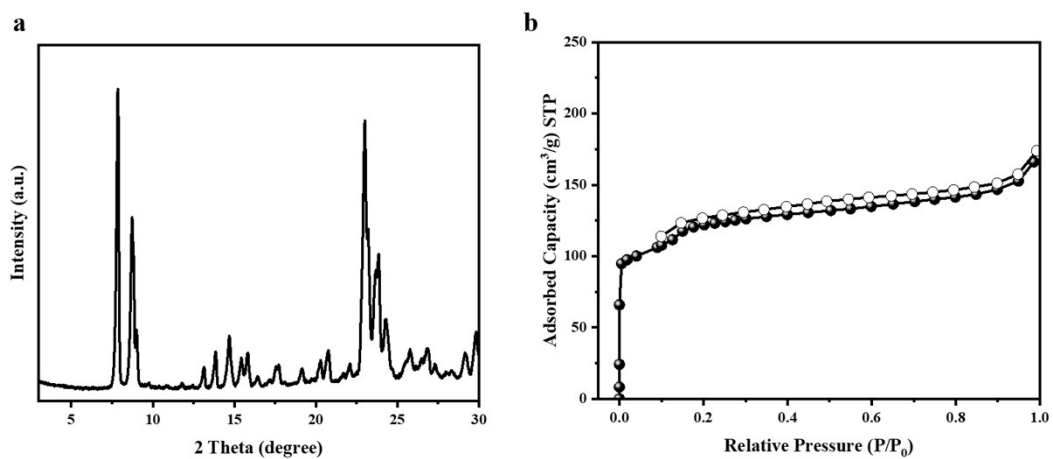

218

219 Fig.S4 (a) PXRD patterns and (b) N<sub>2</sub> adsorption-desorption isotherms of ZSM-5

220

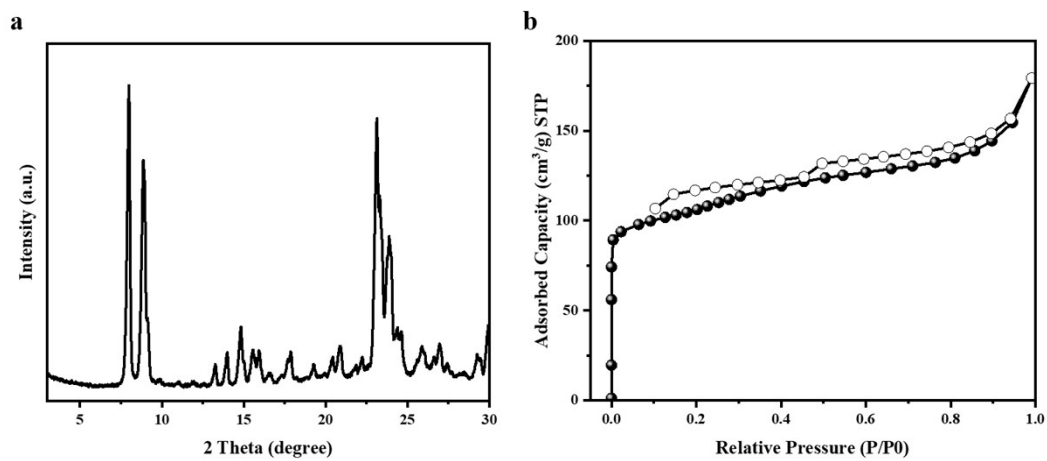

221

222 Fig.S5 (a) PXRD patterns and (b) N<sub>2</sub> adsorption-desorption isotherms of ZSM-5-M

223

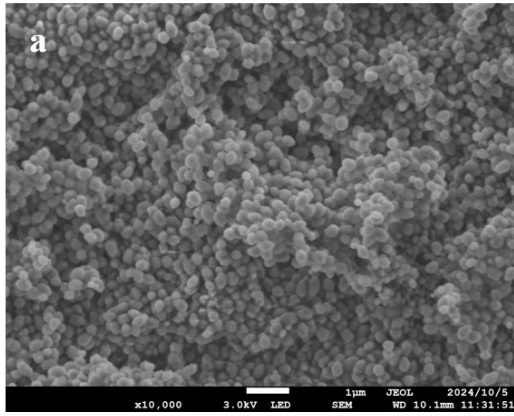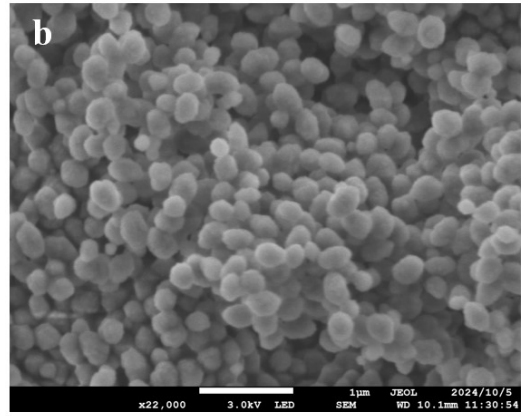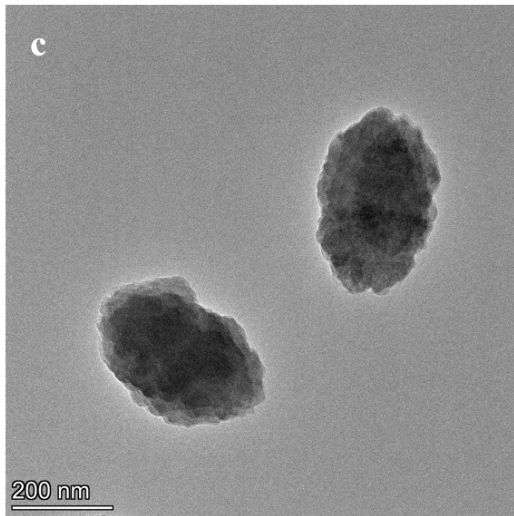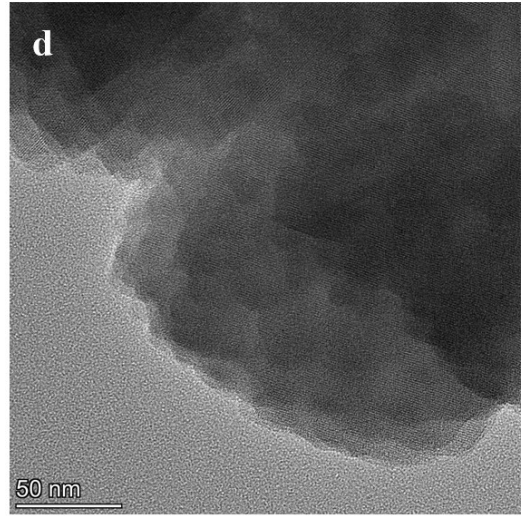

224

225

Fig.S6 (a, b) SEM images and (c, d) TEM images of Beta-C

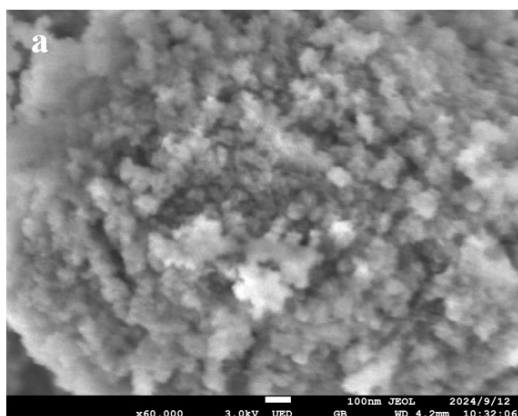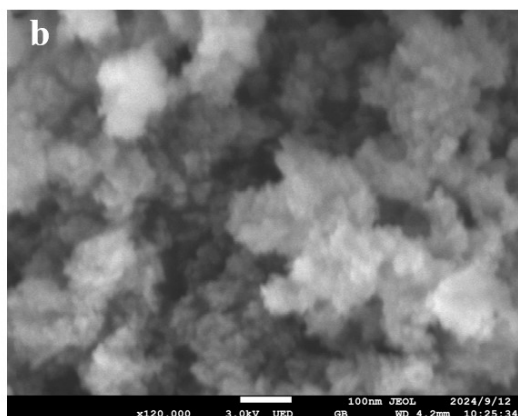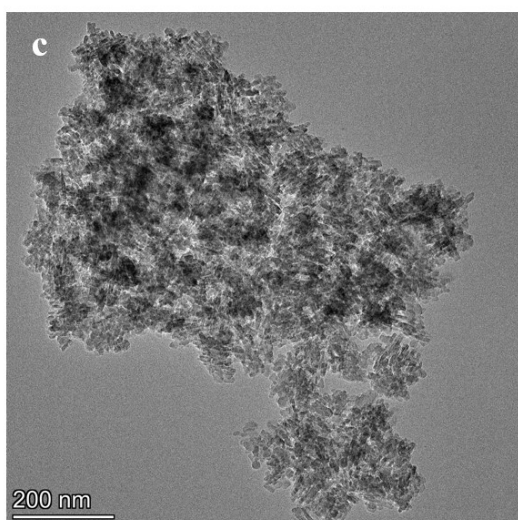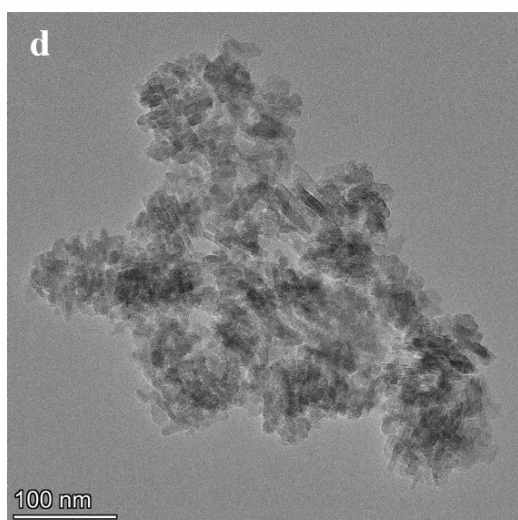

226

227

Fig.S7 (a, b) SEM images and (c, d) TEM images of SPP

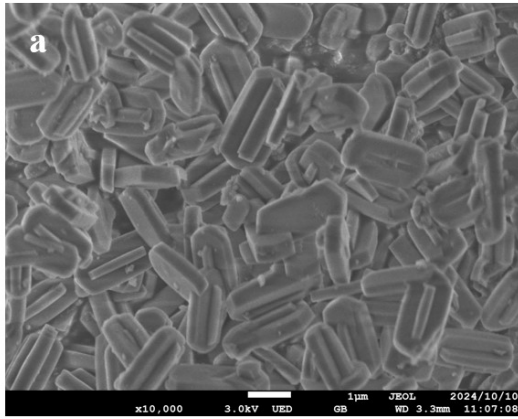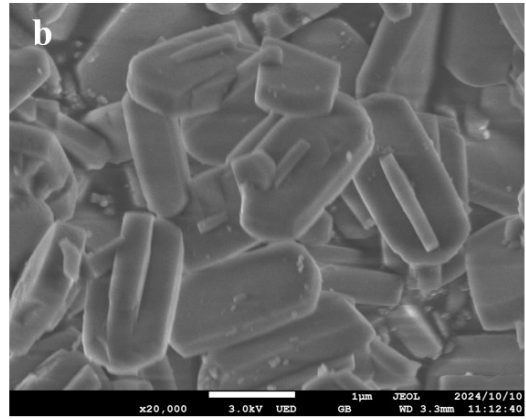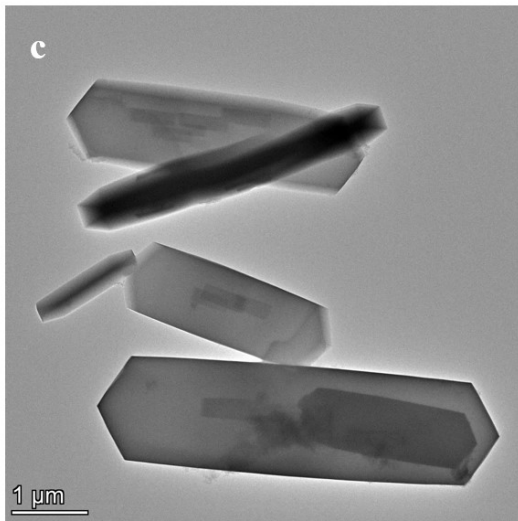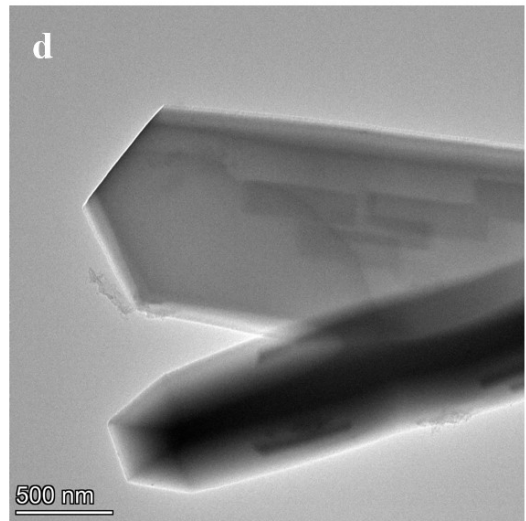

228

229

Fig.S8 (a, b) SEM images and (c, d) TEM images of ZSM-5

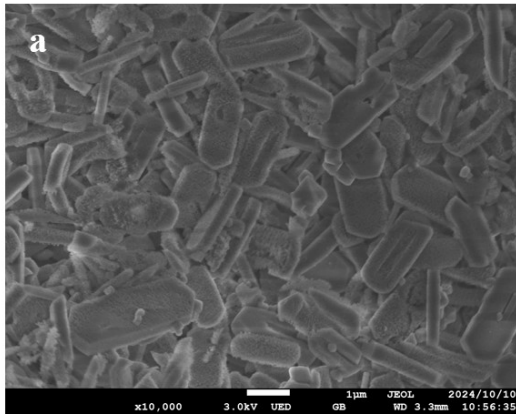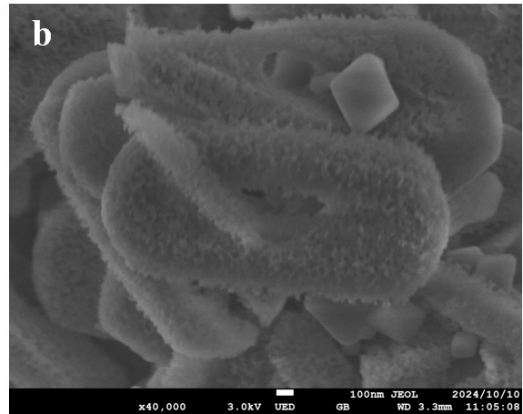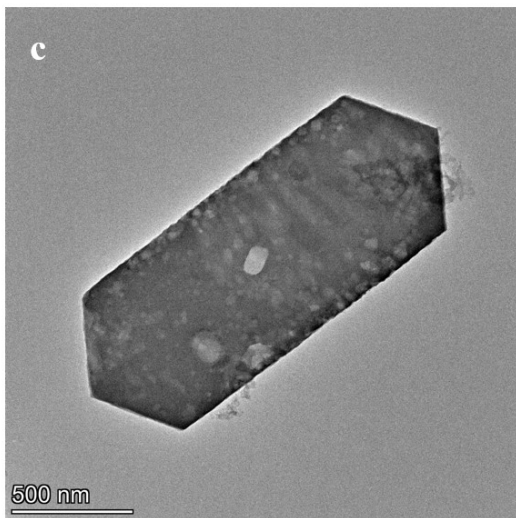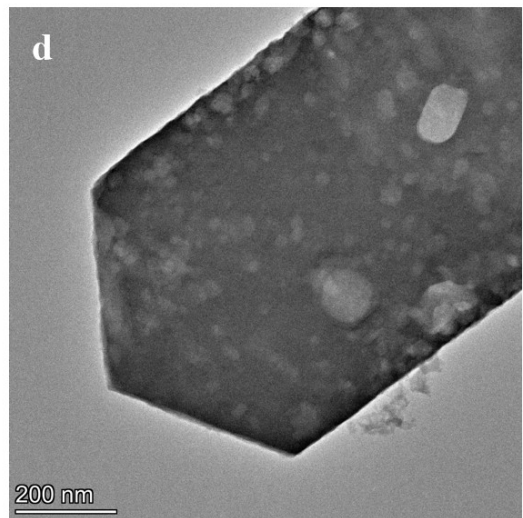

230

231

Fig.S9 (a, b) SEM images and (c, d) TEM images of ZSM-5-M

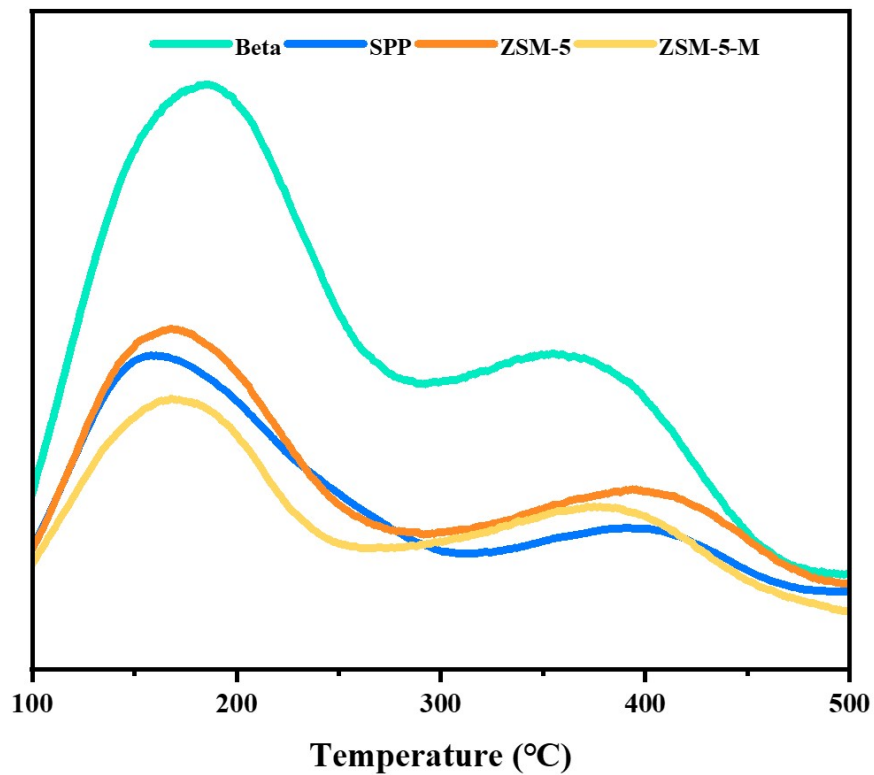

232

233

234

Fig.S10 NH<sub>3</sub>-TPD profiles of comparison catalysts

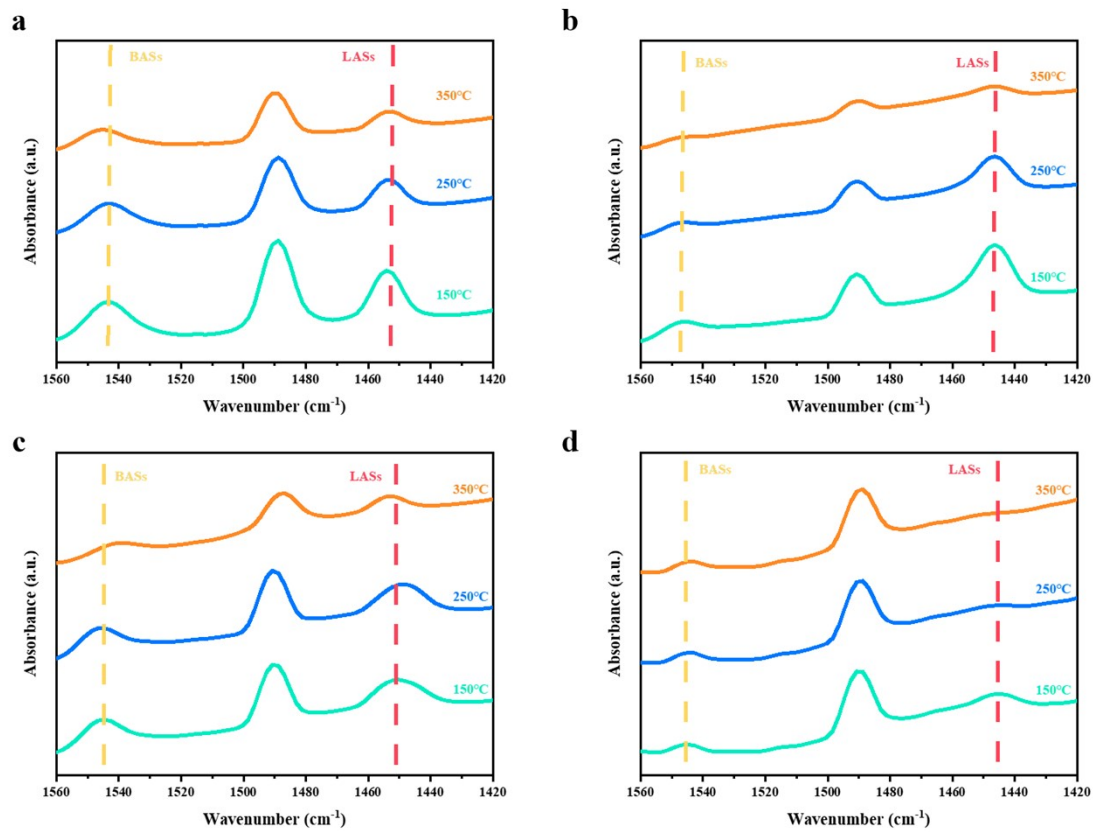

235

236 Fig.S11 Py-FTIR spectra of (a) Beta-C, (b) SPP, (c) ZSM-5, (d) ZSM-5-M at 150 °C,

237

250 °C, 350 °C respectively

238

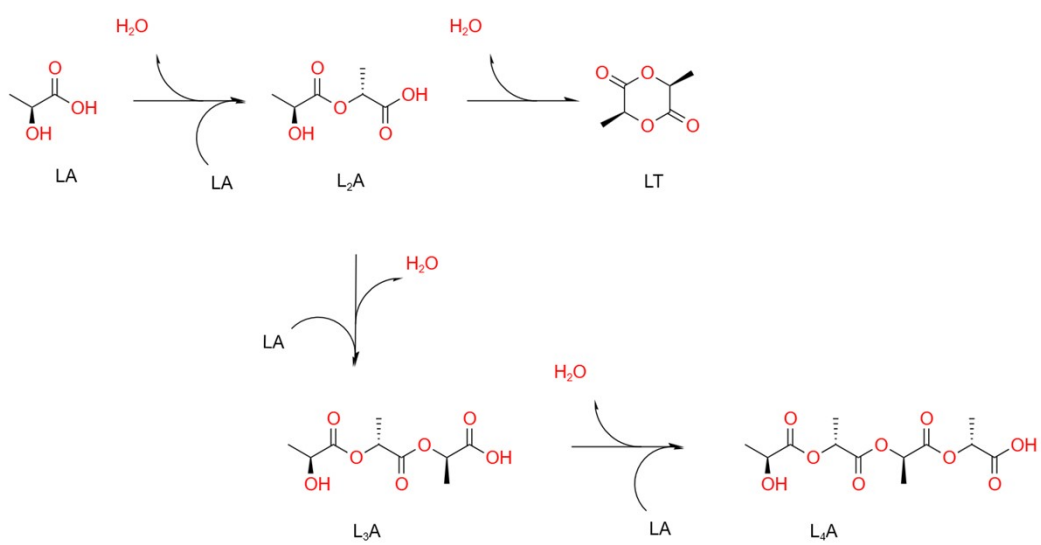

239

240

241

242

Fig.S12 Reaction pathways from LA to LT

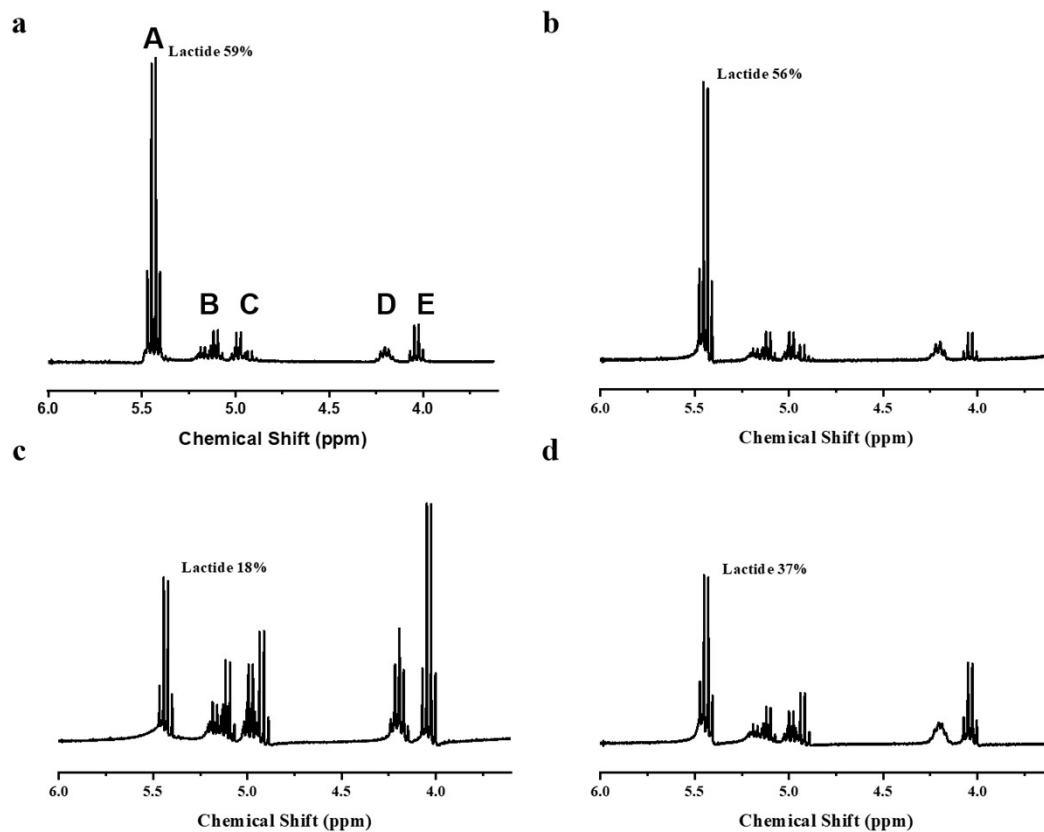

243

244 Fig.S13 Typical  $^1\text{H-NMR}$  analysis (in  $\text{DMSO-d}_6$ ) of the reaction mixture after 5 hours

245

over (a) Beta-C, (b) SPP, (c) ZSM-5, (d) ZSM-5-M

246

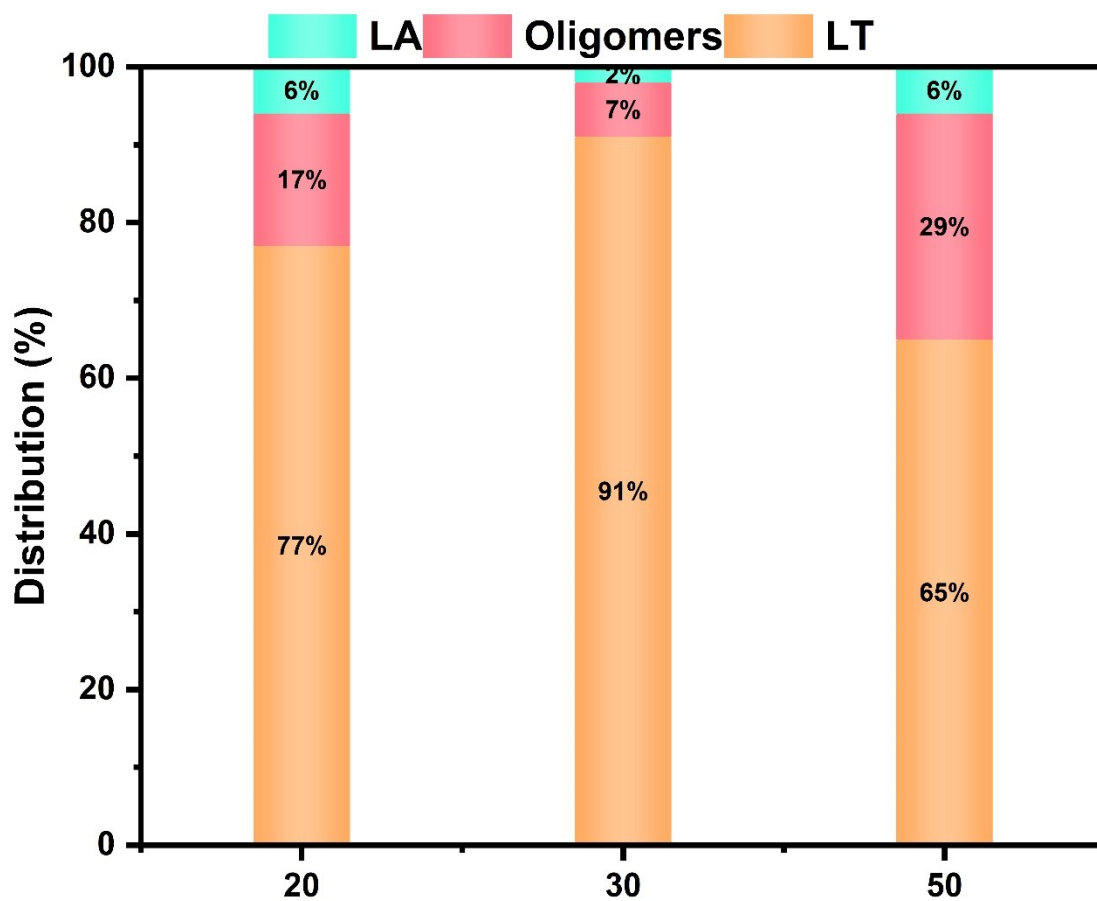

247  
248  
249

Fig.S14 Influence of SAR of EMM-17 on the reaction in toluene.

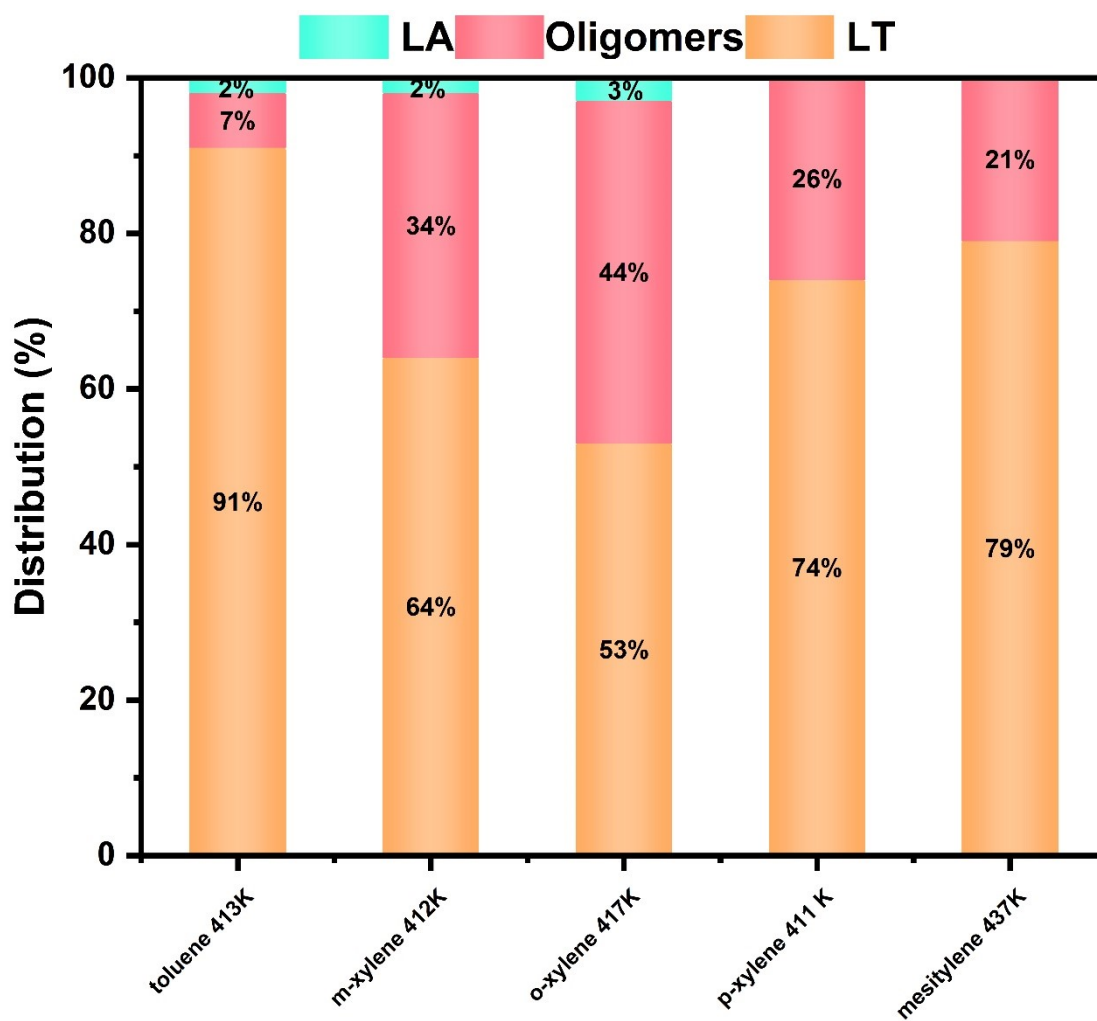

250

251

252

Fig.S15 Influence of different solvents. The boiling point ( $T_b$ ) of each solvent is indicated in the figure. The heating input of the oil bath was set at  $T_b$ .

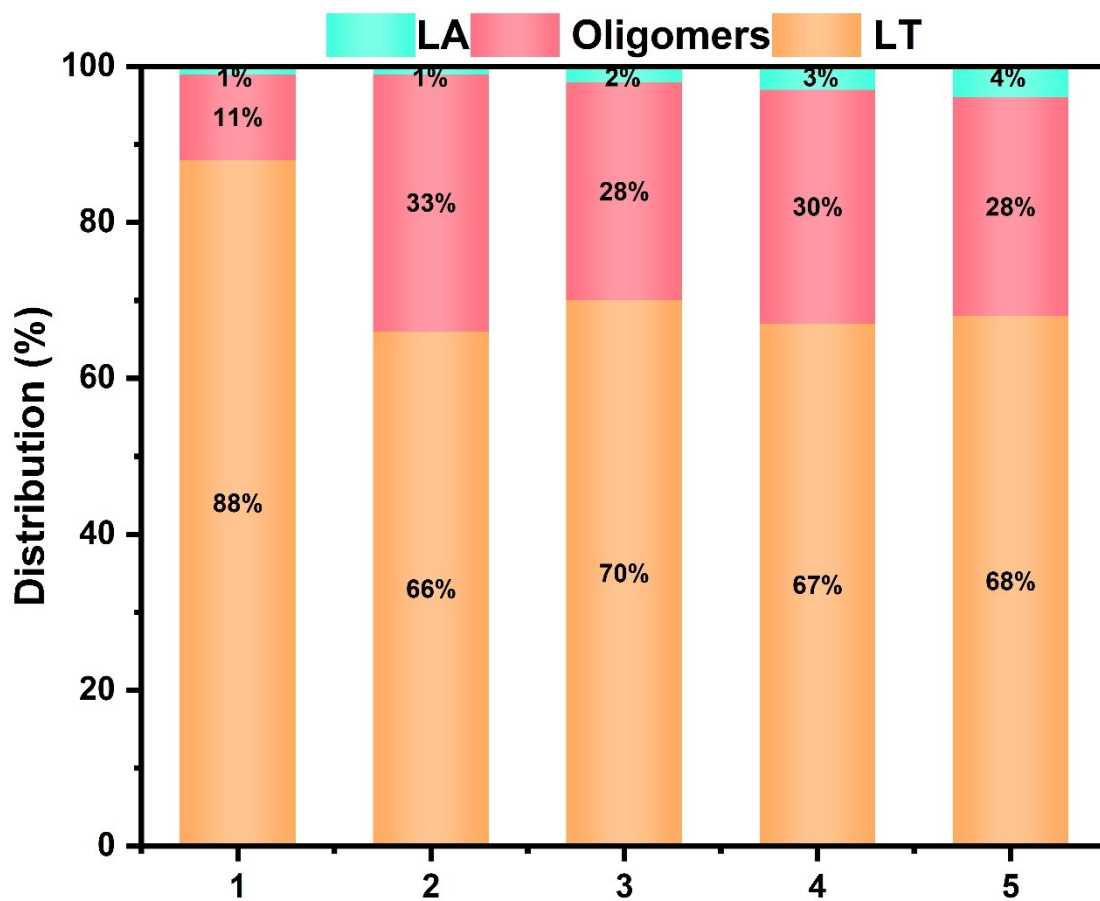

254  
255

Fig.S16 Recyclable tests of EMM-17.

256

257

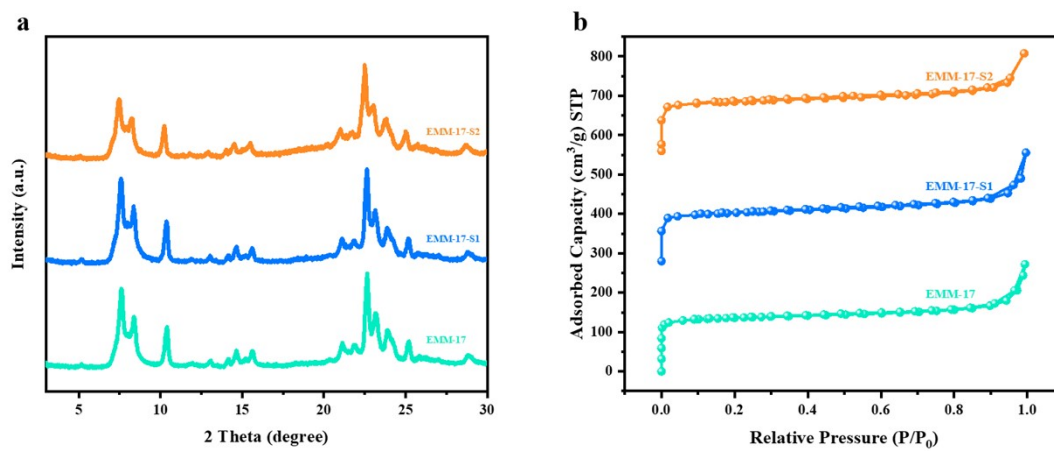

258

259 Fig.S17 (a) PXRD patterns and (b) N<sub>2</sub> adsorption-desorption isotherms of EMM-17,

260

EMM-17-S1 and EMM-17-S2

261

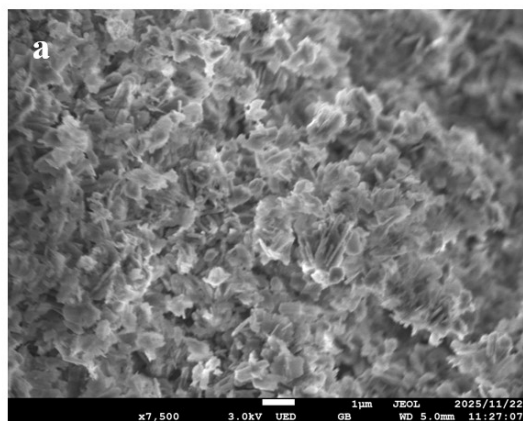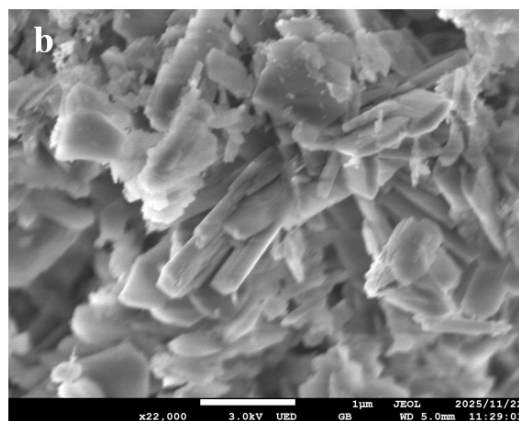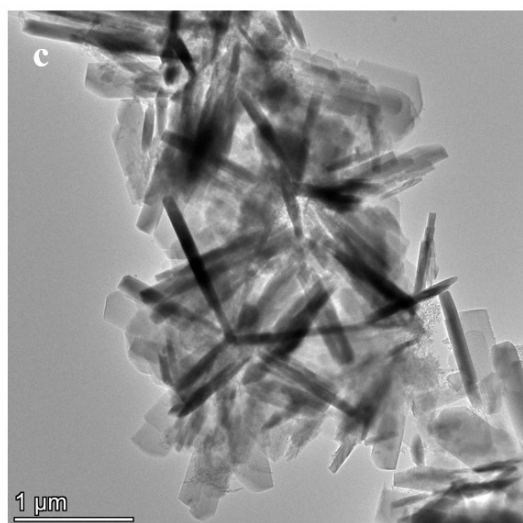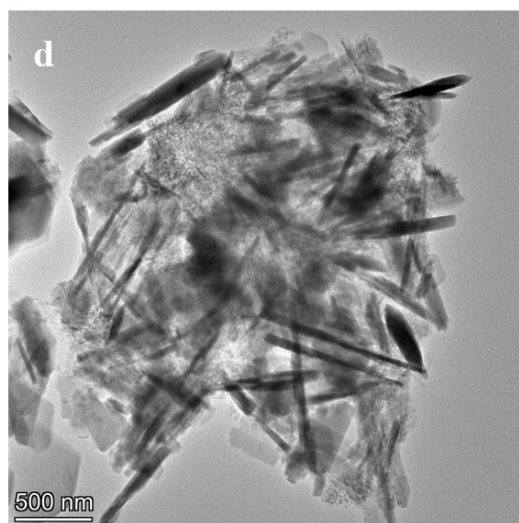

262

263

Fig.S18 (a, b) SEM images and (c, d) TEM images of EMM-17-S1

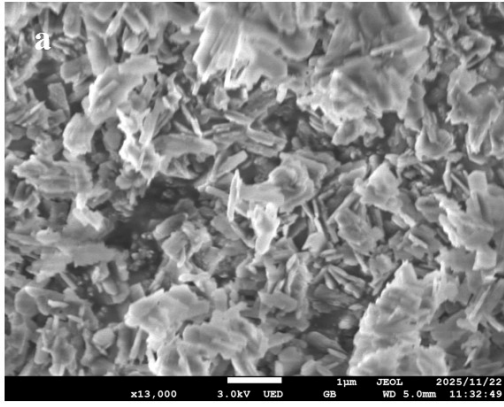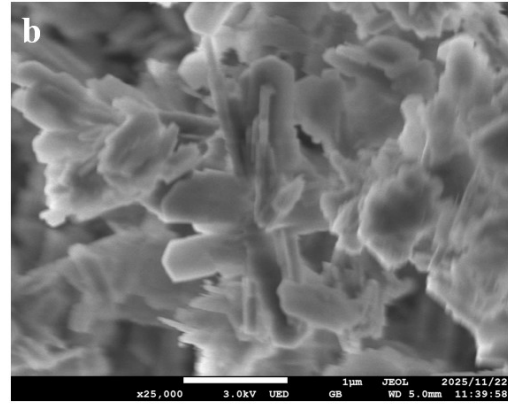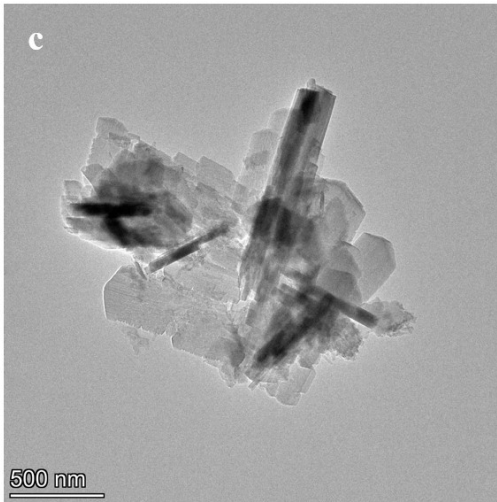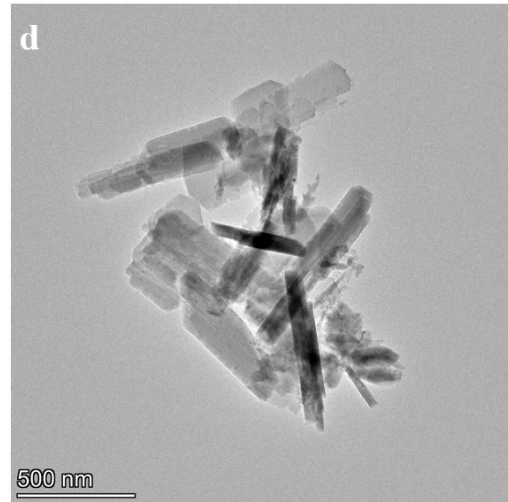

264  
265  
266

Fig.S19 (a, b) SEM images and (c, d) TEM images of EMM-17-S2

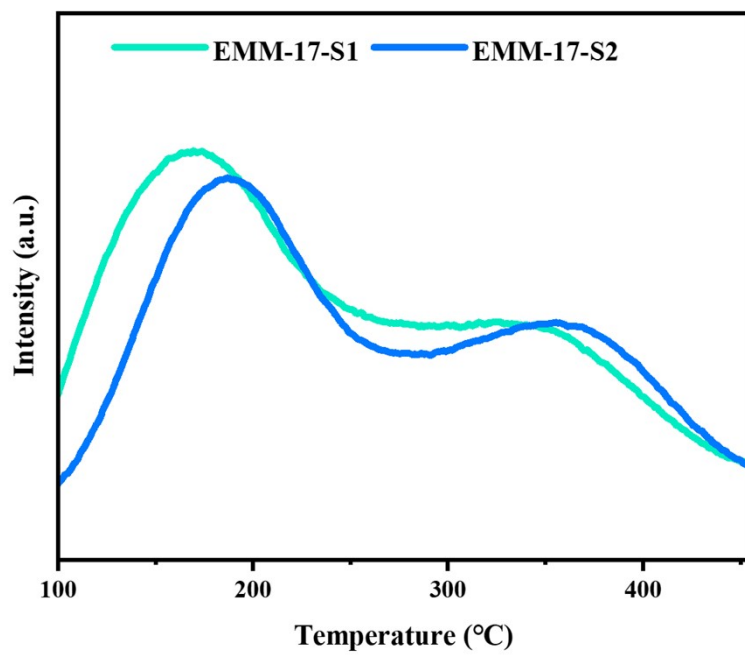

267

268

Fig.S20 NH<sub>3</sub>-TPD profiles of EMM-17-S1 and EMM-17-S2

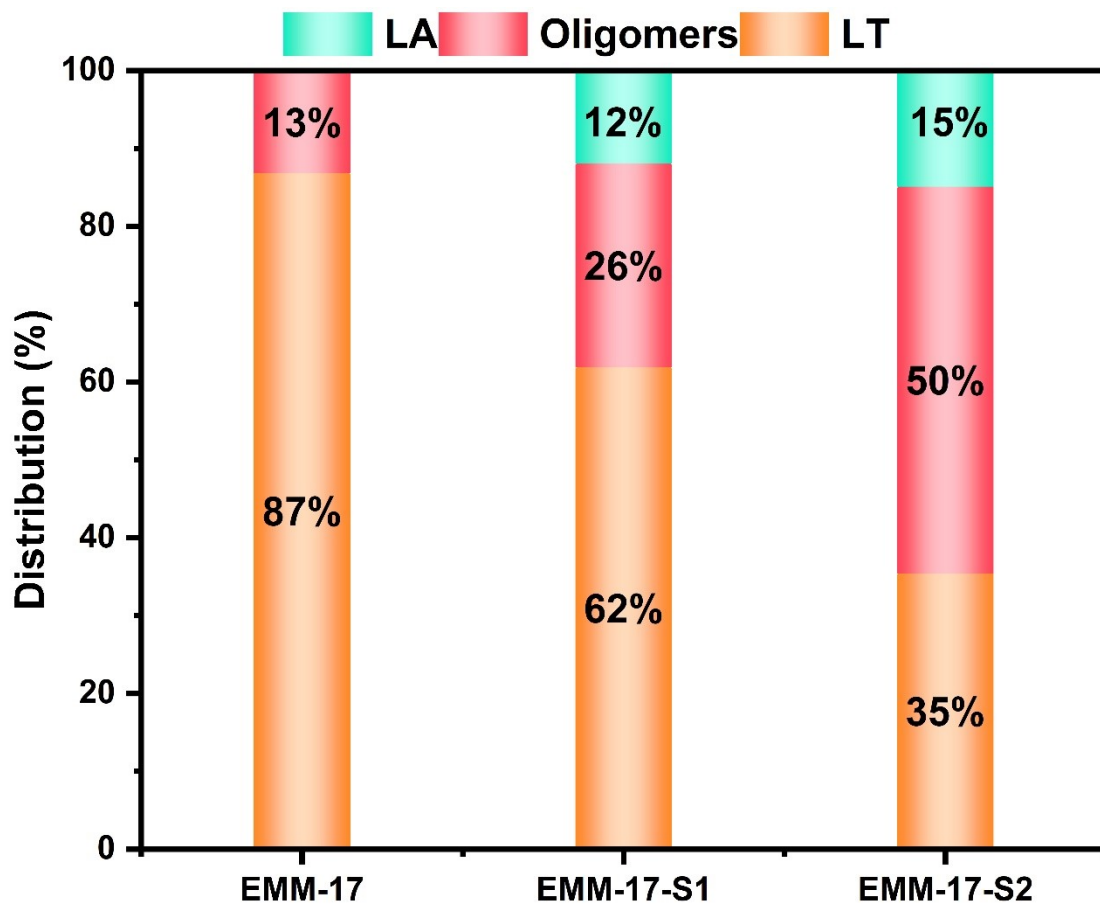

270

271 Fig.S21 Product distribution of EMM-17, EMM-17-S1 and EMM-17-S2. Distribution  
 272 was determined by HPLC.

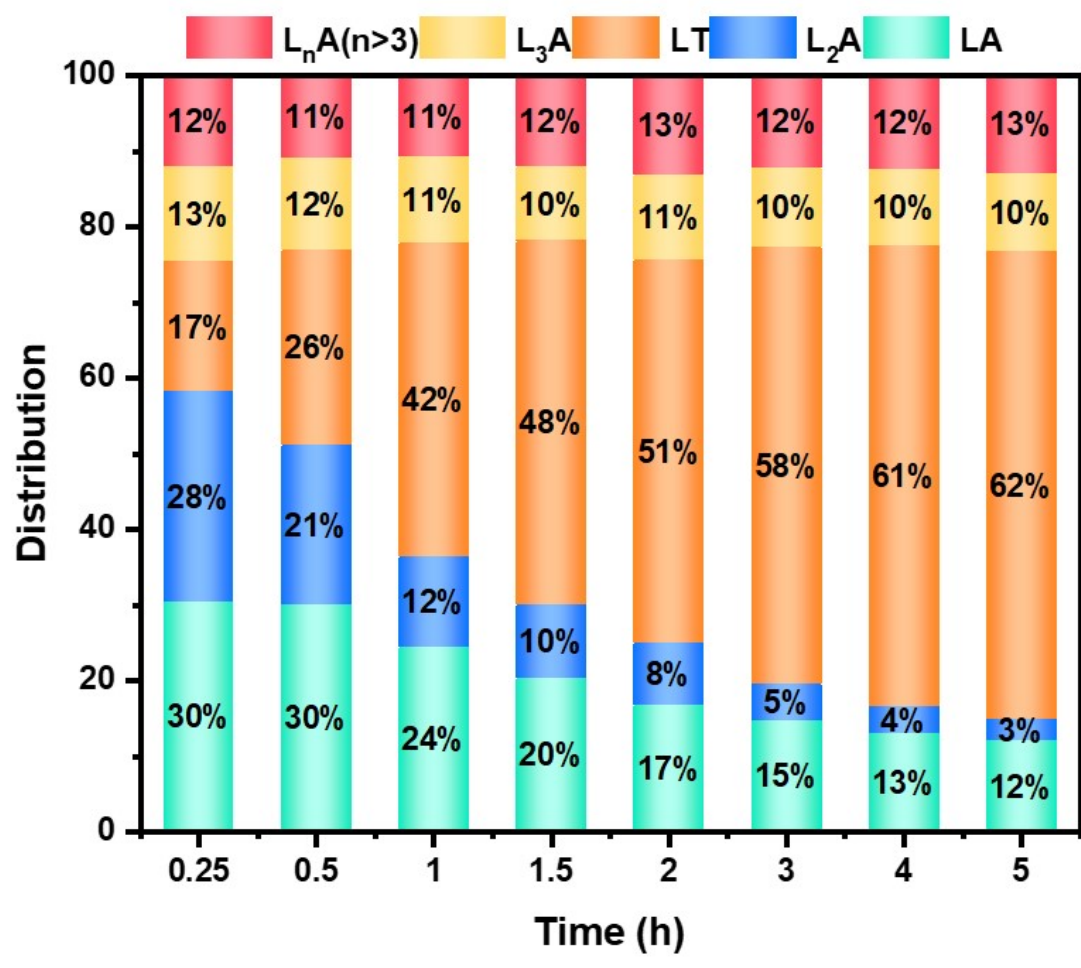

273  
 274  
 275

Fig.S22 HPLC profiles of LA conversion over EMM-17-S1

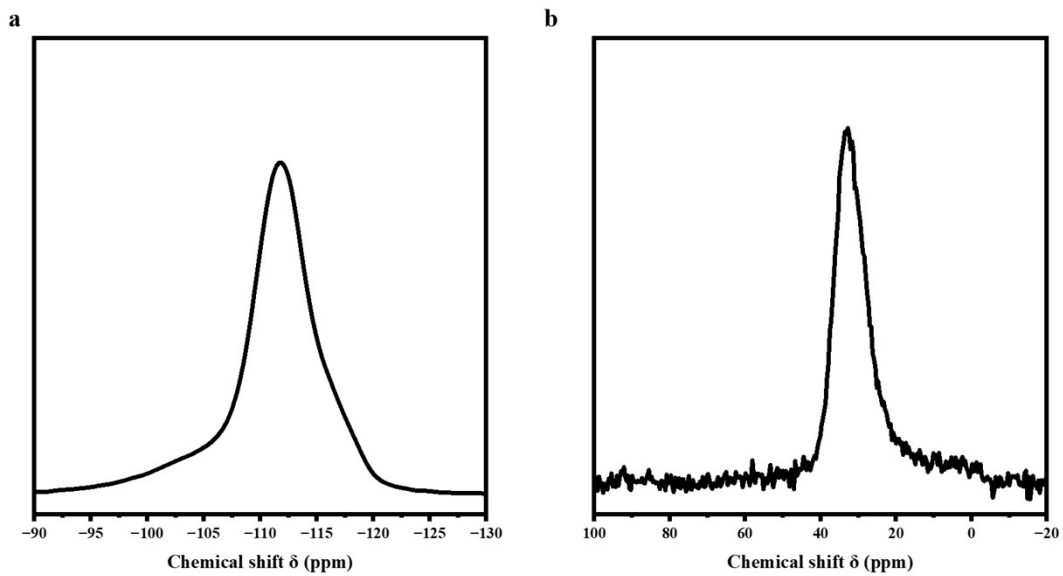

276

277 Fig.S23 (a)  $^{29}\text{Si}$  MAS NMR and (b)  $^{27}\text{Al}$  MAS NMR spectra of EMM-17-S2

278

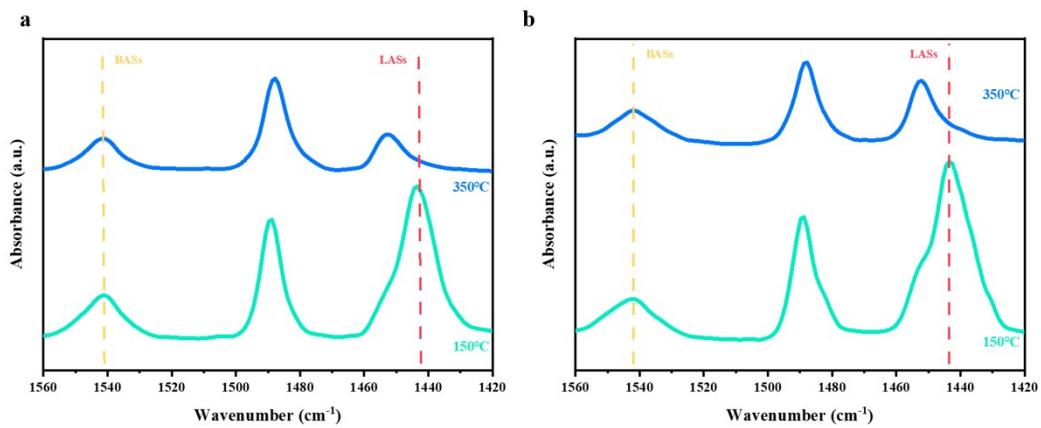

279

280 Fig.S24 Py-FTIR spectra of (a)EMM-17 and (b)EMM-17-S2 at 150 °C, 350 °C

281

respectively

282

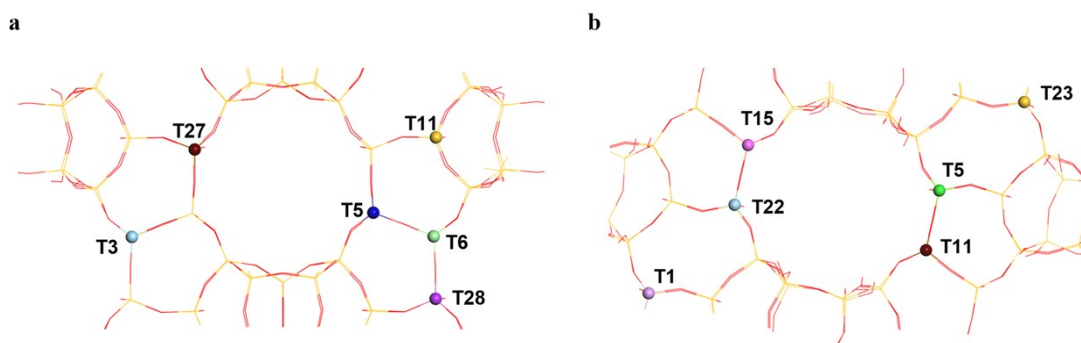

283

284

285

Fig.S25 6 unequal T-sites of (a)EMM-17A and (b) EMM-17B

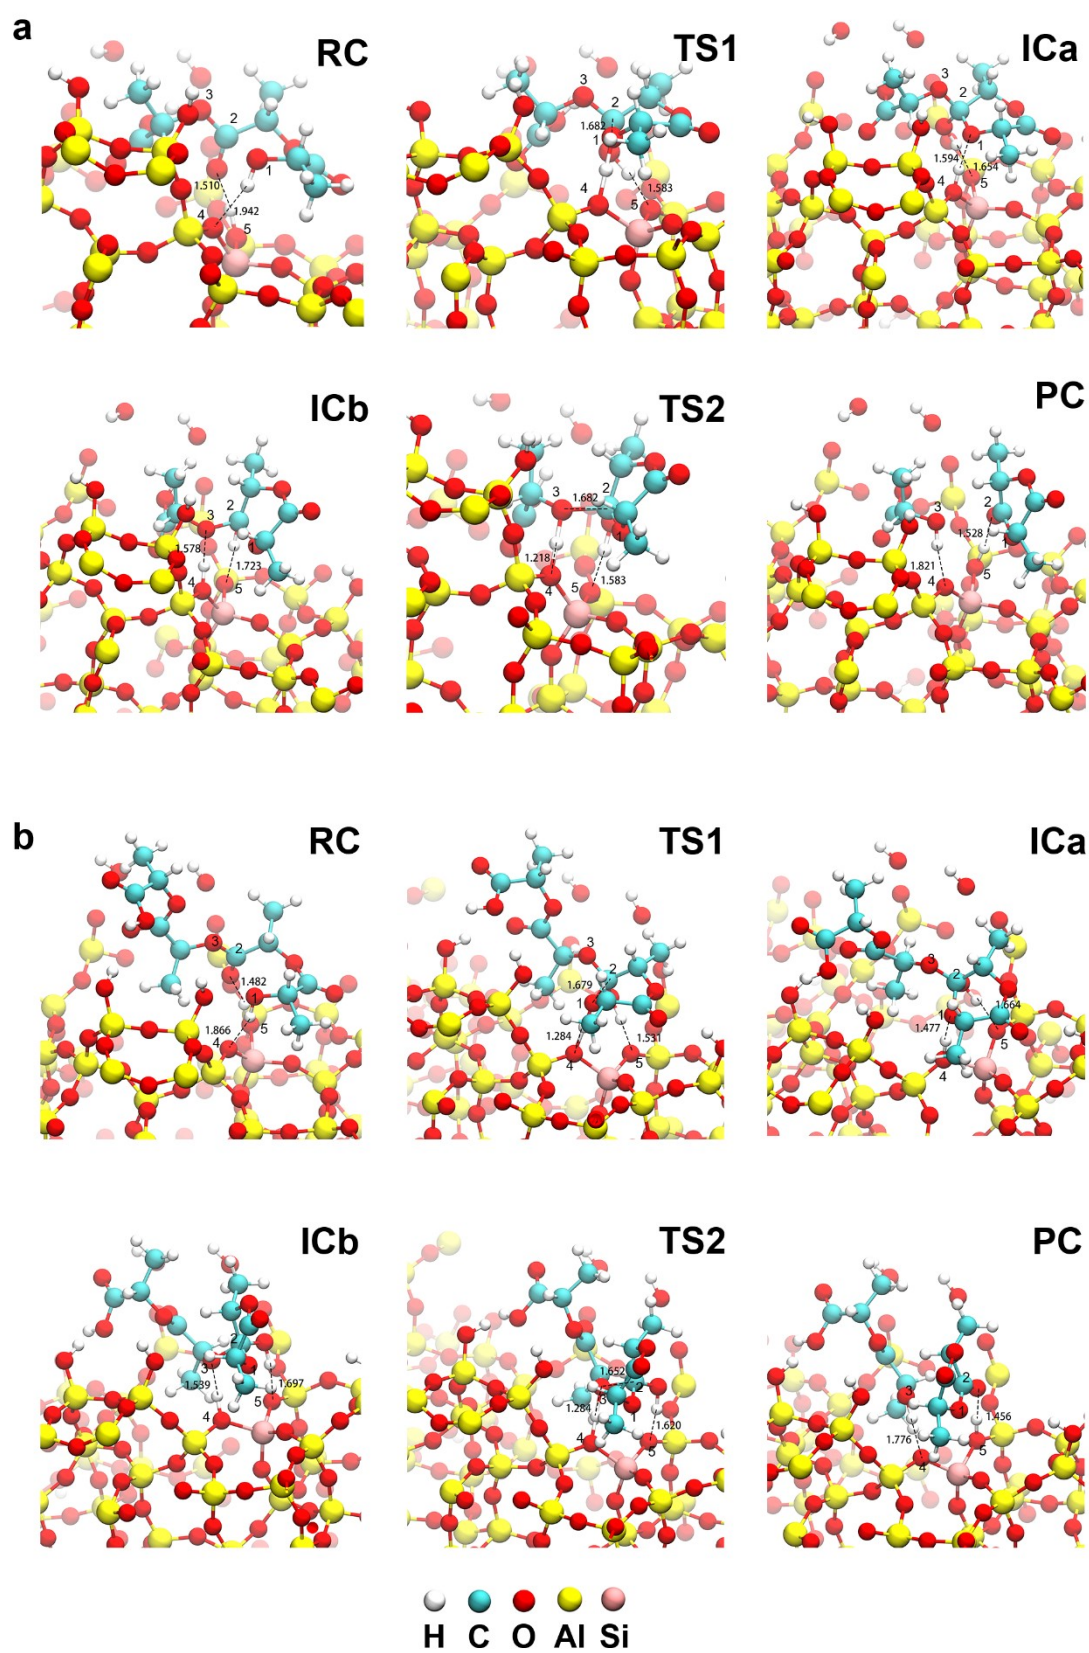

286

287 Fig.S26 PBE/PAW optimized structure of species involved in the LT formation from

288

(a) L<sub>3</sub>A and (b) L<sub>4</sub>A over EMM-17A

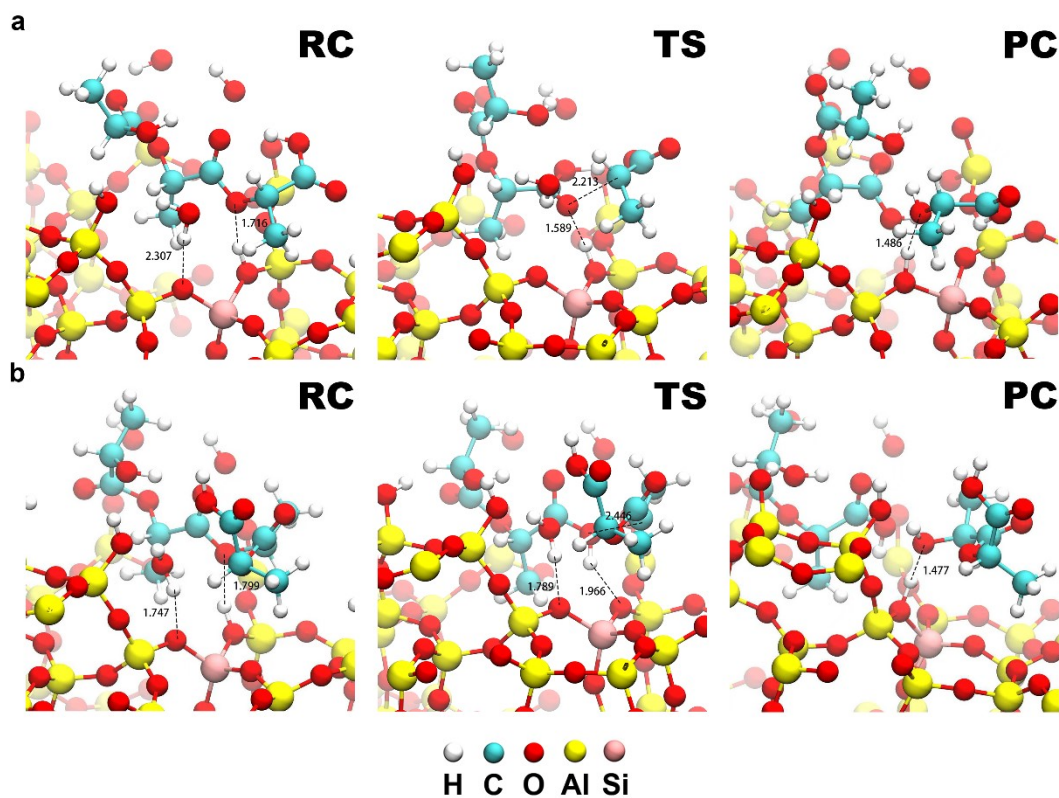

289

290 Fig.S27 PBE/PAW optimized structure of species involved in the  $L_2A$  formation from

291

(a)  $L_3A$  and (b)  $L_4A$  over EMM-17A

292

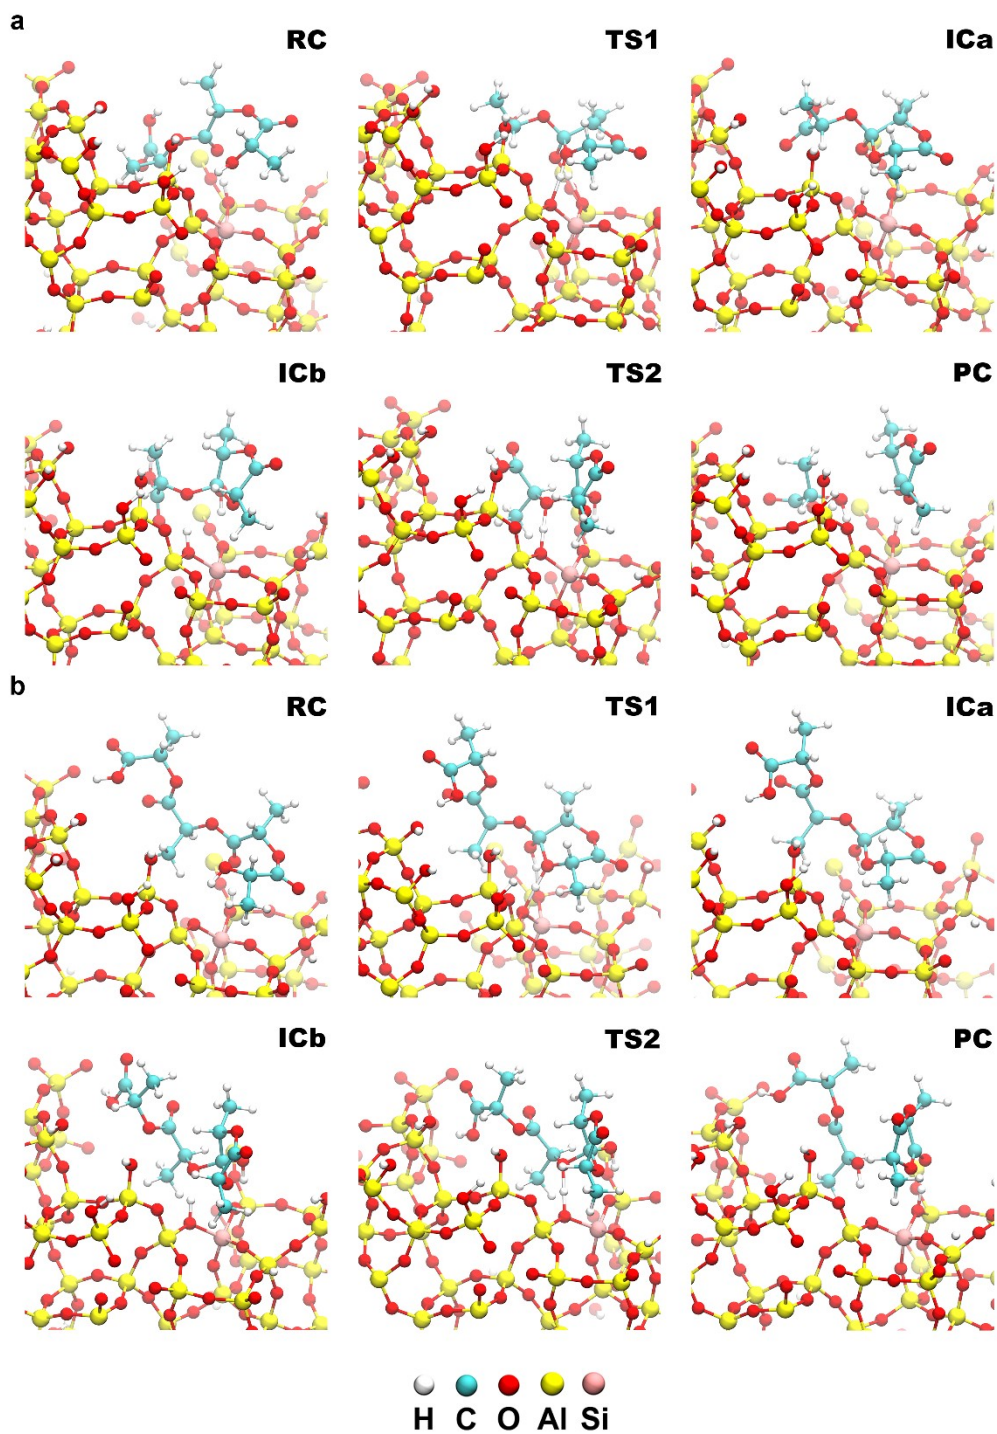

293

294 Fig.S28 PBE/PAW optimized structure of species involved in the LT formation from

295

(a) L<sub>3</sub>A and (b) L<sub>4</sub>A over EMM-17B

296

297

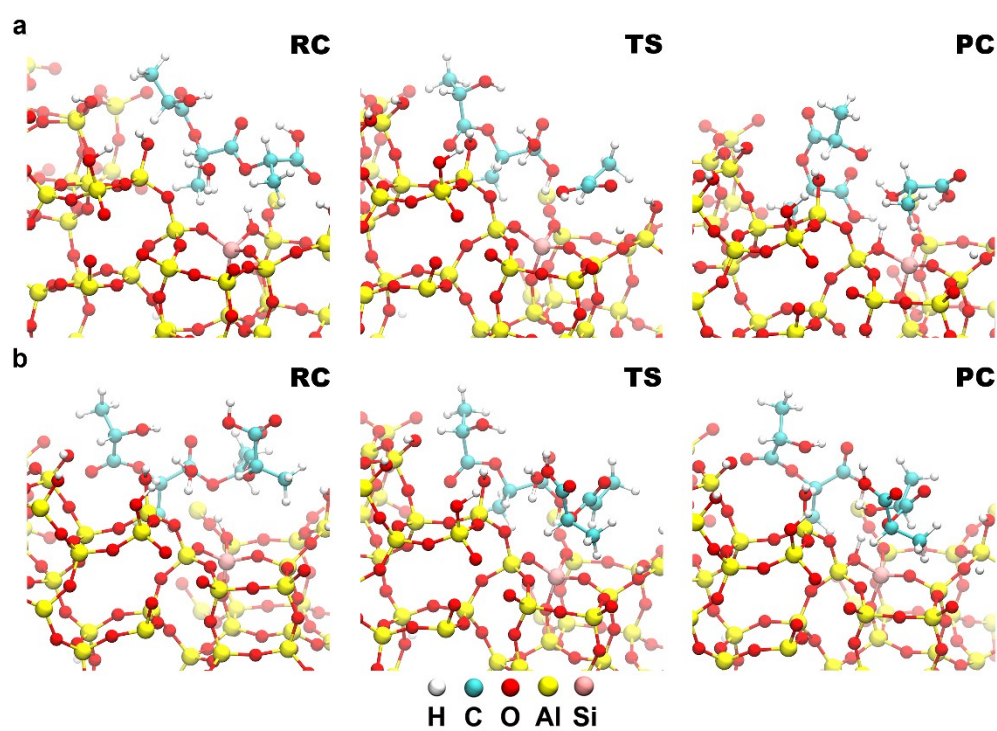

298

299 Fig.S29 PBE/PAW optimized structure of species involved in the L<sub>2</sub>A formation from

300

(a) L<sub>3</sub>A and (b) L<sub>4</sub>A over EMM-17B

301

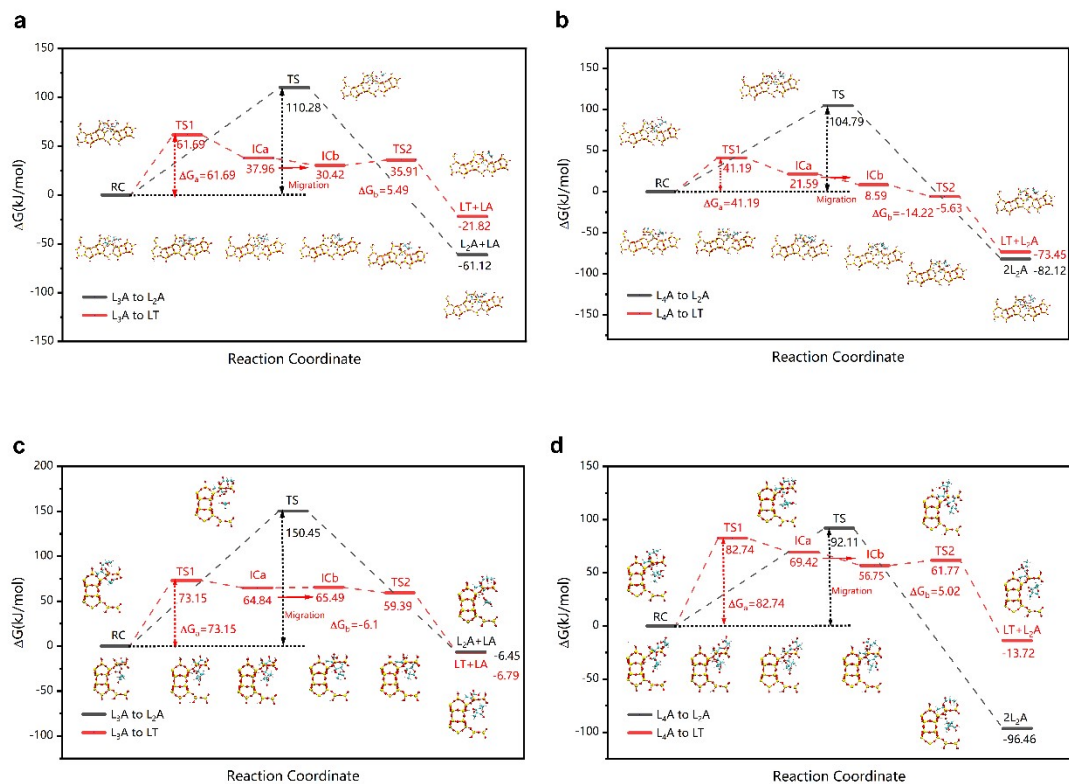

302  
303  
304  
305

Fig.S30 Free energy profiles of the conversion of  $L_3A$  and  $L_4A$  to  $LT$  or  $L_2A$  on the external surface of (a, b) Beta [101] and (c, d) Beta [001]

306

Table S1 Textural properties of various samples by N<sub>2</sub> sorption

| <b>Samples</b> | <b>S<sub>BET</sub><sup>a</sup>(m<sup>2</sup>g<sup>-1</sup>)</b> | <b>S<sub>micro</sub><sup>b</sup>(m<sup>2</sup>g<sup>-1</sup>)</b> | <b>S<sub>ext</sub><sup>b</sup>(m<sup>2</sup>g<sup>-1</sup>)</b> | <b>V<sub>total</sub><sup>c</sup>(cm<sup>3</sup>g<sup>-1</sup>)</b> | <b>V<sub>micro</sub><sup>b</sup>(cm<sup>3</sup>g<sup>-1</sup>)</b> | <b>V<sub>meso</sub><sup>d</sup>(cm<sup>3</sup>g<sup>-1</sup>)</b> |
|----------------|-----------------------------------------------------------------|-------------------------------------------------------------------|-----------------------------------------------------------------|--------------------------------------------------------------------|--------------------------------------------------------------------|-------------------------------------------------------------------|
| <b>EMM-17</b>  | <b>566</b>                                                      | <b>428</b>                                                        | <b>138</b>                                                      | <b>0.57</b>                                                        | <b>0.18</b>                                                        | <b>0.39</b>                                                       |
| <b>Beta</b>    | <b>646</b>                                                      | <b>588</b>                                                        | <b>58</b>                                                       | <b>0.49</b>                                                        | <b>0.23</b>                                                        | <b>0.26</b>                                                       |
| <b>SPP</b>     | <b>753</b>                                                      | <b>484</b>                                                        | <b>269</b>                                                      | <b>1.08</b>                                                        | <b>0.22</b>                                                        | <b>0.86</b>                                                       |
| <b>ZSM-5</b>   | <b>437</b>                                                      | <b>385</b>                                                        | <b>52</b>                                                       | <b>0.26</b>                                                        | <b>0.17</b>                                                        | <b>0.09</b>                                                       |
| <b>ZSM-5-M</b> | <b>399</b>                                                      | <b>271</b>                                                        | <b>128</b>                                                      | <b>0.28</b>                                                        | <b>0.11</b>                                                        | <b>0.17</b>                                                       |

307 <sup>a</sup> S<sub>BET</sub>: Total surface area, calculated by the BET method.308 <sup>b</sup> S<sub>micro</sub>: micropore surface area, S<sub>ext</sub>: external surface area, and V<sub>micro</sub>: micropore

309 volume, calculated by the t-plot method.

310 <sup>c</sup> Total pore volume of N<sub>2</sub> adsorbed at P/P<sub>0</sub>=0.99.311 <sup>d</sup> V<sub>meso</sub>: mesopore volume, V<sub>meso</sub> = V<sub>total</sub> - V<sub>micro</sub>.

312

313 Table S2 Textural properties of EMM-17, EMM-17-S1 and EMM-17-S2 by N<sub>2</sub>  
 314 sorption

| <b>Samples</b>   | <b>S<sub>BET</sub><sup>a</sup>(m<sup>2</sup>g<sup>-1</sup>)</b> | <b>S<sub>micro</sub><sup>b</sup>(m<sup>2</sup>g<sup>-1</sup>)</b> | <b>S<sub>ext</sub><sup>b</sup>(m<sup>2</sup>g<sup>-1</sup>)</b> | <b>V<sub>total</sub><sup>c</sup>(cm<sup>3</sup>g<sup>-1</sup>)</b> | <b>V<sub>micro</sub><sup>b</sup>(cm<sup>3</sup>g<sup>-1</sup>)</b> | <b>V<sub>meso</sub><sup>d</sup>(cm<sup>3</sup>g<sup>-1</sup>)</b> |
|------------------|-----------------------------------------------------------------|-------------------------------------------------------------------|-----------------------------------------------------------------|--------------------------------------------------------------------|--------------------------------------------------------------------|-------------------------------------------------------------------|
| <b>EMM-17</b>    | <b>532</b>                                                      | <b>474</b>                                                        | <b>58</b>                                                       | <b>0.39</b>                                                        | <b>0.19</b>                                                        | <b>0.20</b>                                                       |
| <b>EMM-17-S1</b> | <b>466</b>                                                      | <b>394</b>                                                        | <b>72</b>                                                       | <b>0.38</b>                                                        | <b>0.16</b>                                                        | <b>0.22</b>                                                       |
| <b>EMM-17-S2</b> | <b>487</b>                                                      | <b>406</b>                                                        | <b>81</b>                                                       | <b>0.38</b>                                                        | <b>0.16</b>                                                        | <b>0.22</b>                                                       |

315

316

317

Table S3 Adsorption energy on different T sites of EMM-17A

---

| <b>EMM-17A Al site</b> | <b>L<sub>3</sub>A→LT Eads (kJ/mol)</b> | <b>L<sub>4</sub>A→LT Eads (kJ/mol)</b> |
|------------------------|----------------------------------------|----------------------------------------|
| <b>T3</b>              | <b>-206.43</b>                         | <b>-207.74</b>                         |
| <b>T5</b>              | <b>-211.54</b>                         | <b>-216.69</b>                         |
| <b>T6</b>              | <b>-153.97</b>                         | <b>-200.71</b>                         |
| <b>T11</b>             | <b>-166.36</b>                         | <b>-138.37</b>                         |
| <b>T27</b>             | <b>-183.01</b>                         | <b>-190.21</b>                         |
| <b>T28</b>             | <b>-183.89</b>                         | <b>-157.15</b>                         |

---

318

319

320

Table S4 Adsorption energy on different T sites of EMM-17B

---

| <b>EMM-17B Al site</b> | <b>L<sub>3</sub>A→LT Eads (kJ/mol)</b> | <b>L<sub>4</sub>A→LT Eads (kJ/mol)</b> |
|------------------------|----------------------------------------|----------------------------------------|
| <b>T1</b>              | <b>-143.18</b>                         | <b>-141.25</b>                         |
| <b>T5</b>              | <b>-170.04</b>                         | <b>-170.67</b>                         |
| <b>T11</b>             | <b>-185.39</b>                         | <b>-188.32</b>                         |
| <b>T15</b>             | <b>-171.59</b>                         | <b>-261.50</b>                         |
| <b>T22</b>             | <b>-150.58</b>                         | <b>-230.08</b>                         |
| <b>T23</b>             | <b>-145.23</b>                         | <b>-101.55</b>                         |

---

321

322

323 Table S5 Free energy of L<sub>3</sub>A and L<sub>4</sub>A hydrolysis and LT production on the external  
 324 surface of EMM-17 and Beta

| kJ/mol                            | EMM-17A |       | EMM-17B |       | Beta [101] |        | Beta [001] |      |
|-----------------------------------|---------|-------|---------|-------|------------|--------|------------|------|
|                                   | TS1     | TS2   | TS1     | TS2   | TS1        | TS2    | TS1        | TS2  |
| L <sub>3</sub> A→L <sub>2</sub> A | 76.69   |       | 159.29  |       | 110.28     |        | 150.45     |      |
| L <sub>4</sub> A→L <sub>2</sub> A | 117.64  |       | 102.44  |       | 104.79     |        | 92.11      |      |
| L <sub>3</sub> A→LT               | 36.79   | 14.73 | 33.96   | 20.07 | 61.69      | 5.49   | 73.15      | -6.1 |
| L <sub>4</sub> A→LT               | 31.98   | 1.51  | 94.52   | 31.28 | 41.19      | -14.22 | 82.74      | 5.02 |

325

326

328 **References**

- 329 1. T. W. Beutel, A. M. Willard, C. Lee, M. S. Martinez and R. Dugan, *J. Phys. Chem. C*, 2021,  
330 **125**, 8518-8532.
- 331 2. H. K. Heinichen and W. F. Hölderich, *J. Catal.*, 1999, **185**, 408-414.
- 332 3. G. Kresse and J. Furthmüller, *Comput. Mater. Sci.*, 1996, **6**, 15-50.
- 333 4. P. E. Blöchl, *Phys. Rev. B*, 1994, **50**, 17953-17979.
- 334 5. G. Kresse and D. Joubert, *Phys. Rev. B*, 1999, **59**, 1758-1775.
- 335 6. J. P. Perdew, K. Burke and M. Ernzerhof, *Phys. Rev. Lett.*, 1996, **77**, 3865-3868.
- 336 7. G. Henkelman, B. P. Uberuaga and H. Jónsson, *J. Chem. Phys.*, 2000, **113**, 9901-9904.
- 337 8. G. Henkelman and H. Jónsson, *J. Chem. Phys.* 1999, **111**, 7010-7022.
- 338 9. M. Dusselier, P. Van Wouwe, A. Dewaele, P. A. Jacobs and B. F. Sels, *Science*, 2015, **349**,  
339 78-80.
